# Supplementary material for: Patterns of genetic variation and morphology support the recognition of five species in the Gaultheria leucocarpa Blume (Ericaceae) group from mainland China
Source: PubMed Central journal article supplement (PMC10251198; doi:10.1002/ece3.10178), 2023-06-09
Supplement: ECE3-13-e10178-s003.pdf [file ECE3-13-e10178-s003.pdf]

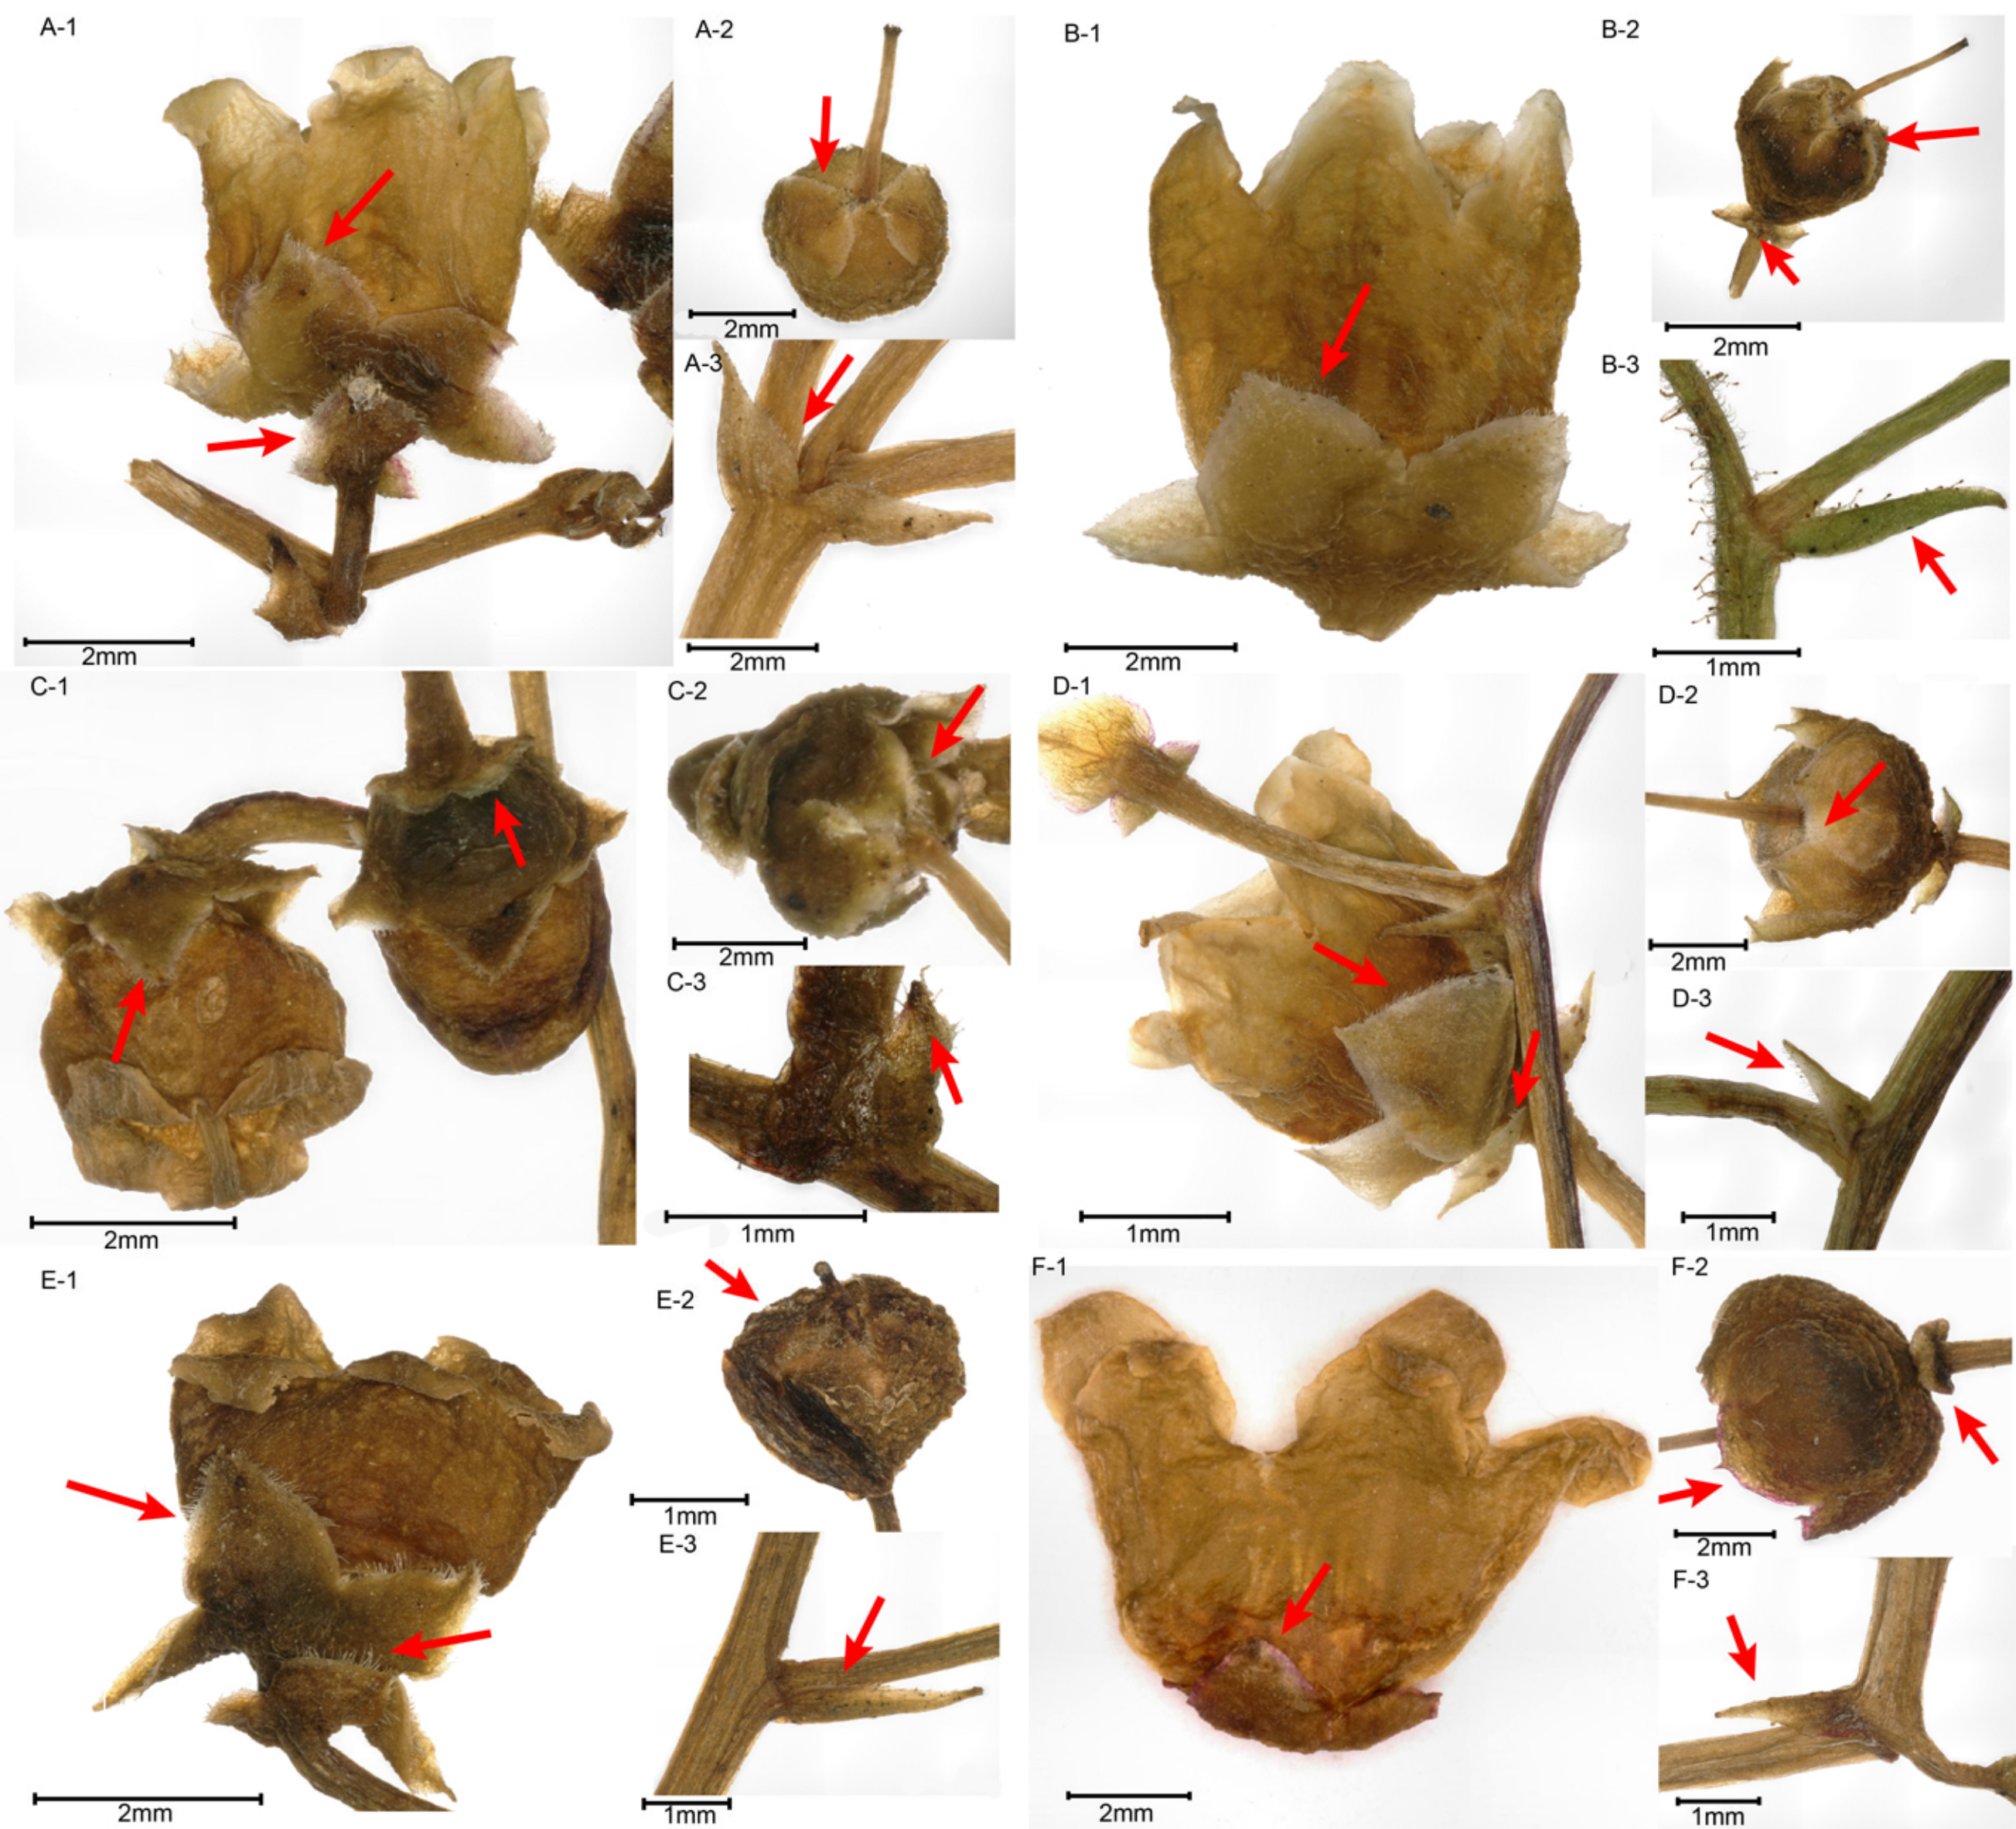

Figure S2
